# Supplementary material for: An A–D–D–A-type non-fullerene small-molecule acceptor with strong near-infrared absorption for high performance polymer solar cells
Source: Royal Society of Chemistry journal article supplement (doi:10.1039/c9tc04898g), 2019-01-01

## Supporting Information

### **An A-D-D-A-type non-fullerene small-molecule acceptor with strong near-infrared absorption for high performance polymer solar cells**

Hua Tan,<sup>\*a,b</sup> Xiangjun Zheng,<sup>a,b</sup> Jianing Zhu,<sup>b</sup> Junting Yu<sup>\*c</sup>, and Weiguo Zhu<sup>\*a</sup>

*<sup>a</sup> School of Materials Science and Engineering, Jiangsu Collaborative Innovation Center of Photovoltaic Science and Engineering, Changzhou University, Changzhou 213164, P. R. China*

*<sup>b</sup> College of Chemistry, Key Lab of Environment-Friendly Chemistry and Application in Ministry of Education, Xiangtan University, Xiangtan 411105, P. R. China*

*<sup>c</sup> Key Laboratory of Theoretical Organic Chemistry and Functional Molecule, Ministry of Education, College of Chemistry and Chemical Engineering, Hunan University of Science and Technology, Xiangtan 411201, P. R. China*

*\*To whom correspondence should be addressed. Email:*

*(H. T.) tanhua815@126.com*

*(J. Y.) yujuntingtt@163.com*

*(W. Z.) zhuwg18@126.com*

---

## Content

### 1. General experimental information on materials and characterizations.

### 2. Devices fabrication and characterizations

### 3. Supplementary figures and tables

**Figure S1.** TGA plot of IDT2-DFIC with a heating rate of 20 °C min<sup>-1</sup> under N<sub>2</sub> atmosphere.

**Figure S2.** DSC plots of IDT2-DFIC and IDIC-4F with a heating rate of 20 °C min<sup>-1</sup> under N<sub>2</sub> atmosphere.

**Figure S3.** The normalized UV-vis spectra of IDT2-DFIC and IDIC-4F in solution.

**Figure S4.** Cyclic voltammetry of the IDT2-DFIC and IDIC-4F films.

**Figure S5-S10.** The detail optimal data of PSCs.

**Figure S11.** Structure characterization of the IDT2-DFIC.

---

## 1. General experimental information on materials and characterizations.

All manipulations were performed under dry nitrogen flow. All reagents were obtained from Aldrich and directly used without further purification. Nuclear magnetic resonance (NMR) spectra were recorded on a Bruker DRX 400 spectrometer using tetramethylsilane as a reference in deuterated chloroform solution at 298 K. UV-Vis absorption spectra were recorded on a HP-8453 UV visible system. MALDI-TOF mass spectrometric measurements were performed on Bruker Biflex III MALDI-TOF. TGA was tested with a TA Q600 thermogravimetric analyzer. Differential scanning calorimeter (DSC) was measured on a TA Q200 Instrument. Cyclic voltammetry was carried out on a CHI660A electro-chemical work station in a three-electrode cell dipped in a 0.1 M tetrabutylammonium hexafluorophosphate ( $\text{Bu}_4\text{NPF}_6$ ) acetonitrile solution calibrated with a ferrocene/ferrocenyl couple ( $\text{Fc}/\text{Fc}^+$ ) under nitrogen protection at a scan rate of  $100 \text{ mV s}^{-1}$  and room temperature (RT). In this three-electrode cell, a platinum rod, platinum wire and  $\text{Ag}/\text{AgCl}$  were used as a working electrode, counter electrode and reference electrode, respectively. Surface morphologies were recorded by transmission electron microscopy (TEM), which was carried out on a FEI Tecnai T20 with  $\text{LaB}_6$  operated at 200 kV.

### Synthesis of IDT2-CHO

The compound Br-IDT-CHO (300 mg, 0.30 mmol) and  $\text{Bu}_6\text{Sn}_2$  (79 mg, 0.14 mmol) were dissolved in toluene (15 mL).  $\text{Pd}_2(\text{dba})_3$  (30 mg) was added as a catalyst and  $\text{P}(\text{o-tol})_3$  (40 mg) was refluxed for 24 hours at  $110^\circ\text{C}$  under  $\text{N}_2$  atmosphere. After cooling to room temperature and vacuum to remove the solvent, the crude product was

---

purified by silica gel using a mixture of hexane/dichloromethane as the eluent to give an orange solid (227 mg, 81%).  $^1\text{H}$  NMR (400 MHz,  $\text{CDCl}_3$ ),  $\delta$  (ppm), 9.80 (s, 2H), 7.63 (s, 2H), 7.52 (s, 2H), 7.39 (s, 2H), 7.14-7.12 (m, 16H), 7.09-7.07 (m, 18H), 2.58-2.55 (m, 16H), 1.60-1.54 (m, 16H), 1.33-1.30 (m, 48H), 0.89-0.86 (m, 24H).

### Synthesis of IDT2-DFIC

The compound IDT2-CHO (260 mg, 0.14 mmol) and DFIC (170 mg, 0.70 mmol) were dissolved in THF (15 mL) and pyridine (1 mL). The reaction was stirred at 50 °C for 12 h to precipitate crude product into methanol, vacuum filter after 3h. Then, the product was purified by silica gel using a mixture of hexane/dichloromethane as the eluent to give a black solid (266 mg, 83%).  $^1\text{H}$  NMR (400 MHz,  $\text{CDCl}_3$ ),  $\delta$  (ppm),  $^1\text{H}$  NMR (400 MHz,  $\text{CDCl}_3$ ),  $\delta$  / ppm,  $\delta$  8.87 (s, 2H), 8.55-8.51 (m, 2H), 7.69-7.63 (m, 6H), 7.41 (s, 2H), 7.17-7.09 (m, 34H), 2.59-2.56 (m, 16H), 1.59-1.57 (m, 16H), 1.40-1.30 (m, 48H), 0.89-0.86 (m, 24H).  $^{13}\text{C}$  NMR (101 MHz,  $\text{CDCl}_3$ )  $\delta$  186.09, 162.09, 158.86, 158.44, 157.46, 156.64, 154.29, 142.69, 142.25, 142.03, 140.90, 140.52, 140.27, 139.83, 139.45, 138.71, 133.46, 128.66, 127.75, 120.29, 119.81, 117.47, 114.44, 68.82, 63.09, 62.87, 35.59, 31.73, 31.34, 29.13, 22.61, 14.12. MS (MALDI-TOF) of  $\text{C}_{154}\text{H}_{150}\text{F}_4\text{N}_4\text{O}_2\text{S}_4$  for  $[\text{M}]^+$ : calcd. 2292.06; found: 2292.14.

## 2. Devices Fabrication and Characterizations

---

Bulk heterojunction solar cells were fabricated with the following conventional structure: ITO/ZnO/active layer/MoO<sub>3</sub>/Ag. ITO substrates were cleaned and then dried in an oven at 85°C for 12 hours. The ZnO precursor was spin-coated at 3000 r.p.m. onto the ITO surface and thermal annealed (200 °C) for 60 min in air, and the thickness of ZnO films are about 30 nm. Then the ZnO-coated substrates were transferred into a nitrogen-filled glove box. A 22 mg mL<sup>-1</sup> chlorobenzene solution of PBDB-T: IDT2-DFIC and PBDB-T: IDIC-4F (1:1.2 weight ratio) was spin-coated at 3000 r.p.m. upon ZnO layer. The active layer thermal annealed (110 °C for PBDB-T:IDT2-DFIC and 150°C for PBDB-T: IDIC-4F) for 10 min. Then evaporated 10 nm thick MoO<sub>3</sub> and 100 nm thick Ag on the active layer. The current density-voltage (*J-V*) characteristics of the devices under illumination of AM 1.5 G solar simulator (Newport, 100 mW cm<sup>-2</sup>, calibrated by a silicon reference cell) were measured on a computer-controlled Keithley 2420 Source Measure Unit. The external quantum efficiencies (EQE) of solar cells were analyzed using a certified Newport incident photon conversion efficiency (IPCE) measurement system (Model 66902). The hole mobilities of blend films were investigated by employing the hole-only devices with a structure of ITO/PEDOT:PSS/active layer/MnO<sub>3</sub>/Al. The electron mobilities of blend films were performed in the electron-only devices with a structure of ITO/ZnO/active layer/Ca/Al.

### **3. Supplementary figures and tables**

**Figure S1**

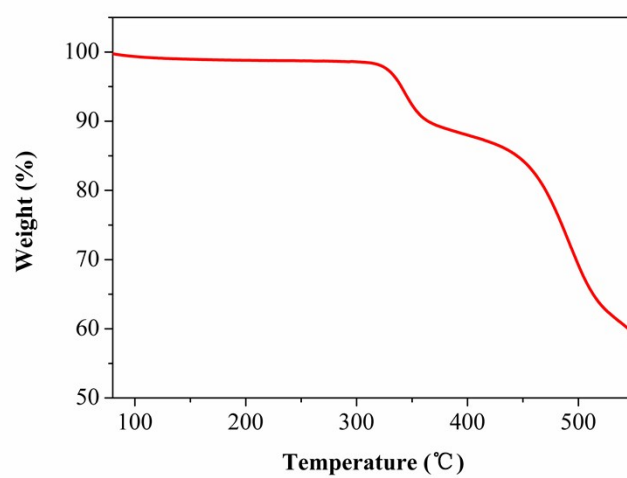

**Figure S2**

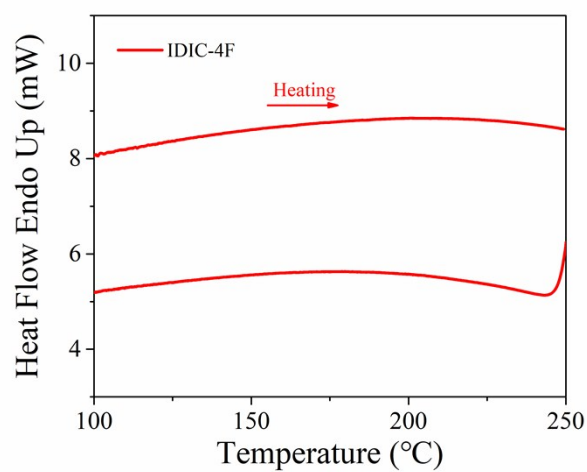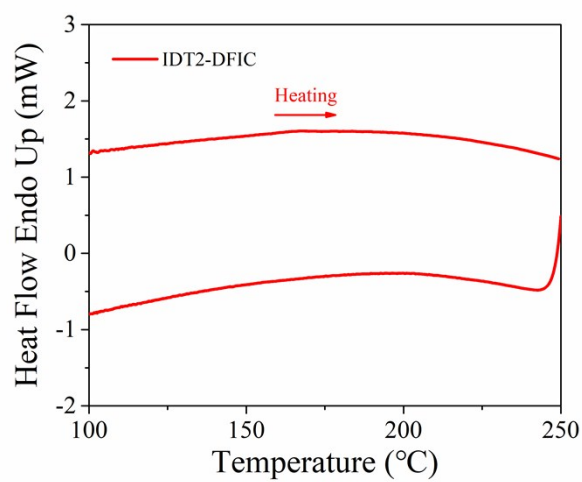

**Figure S3**

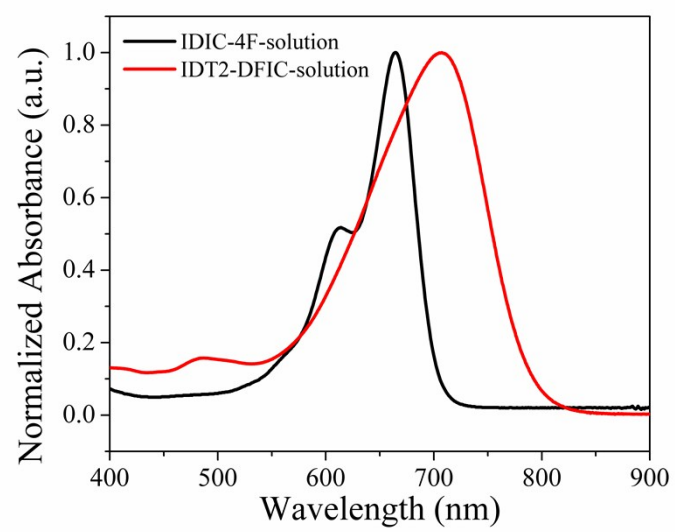

**Figure S4**

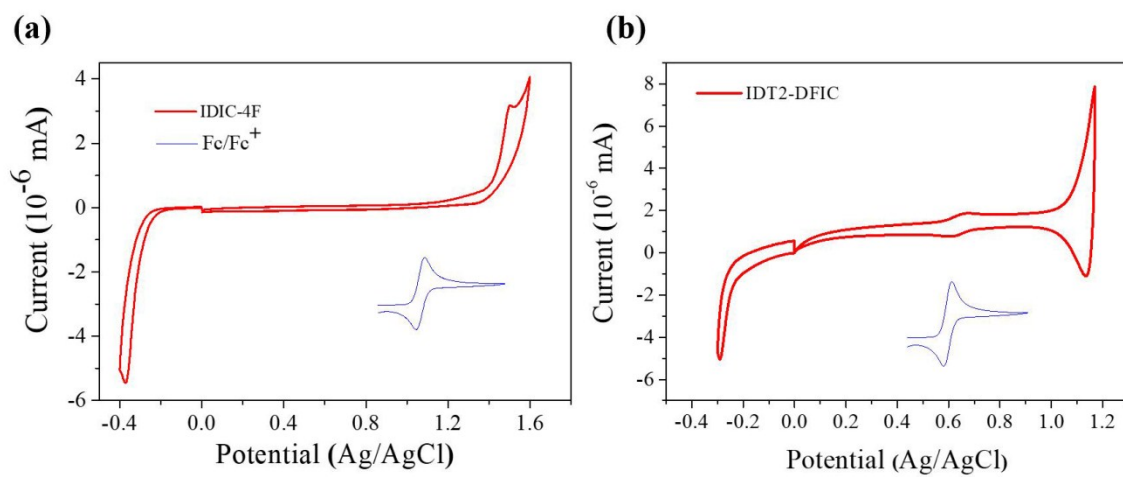

**Figure S5**

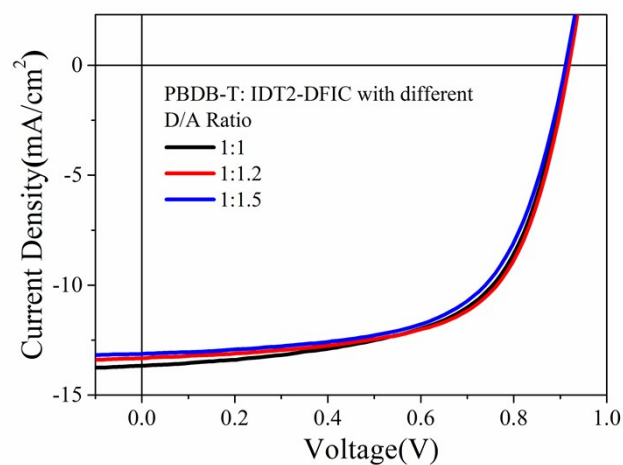

**Table S1.** Photovoltaic properties of the PSCs based on PBDB-T: IDT2-DFIC with different D/A Ratio.

|     |       | V <sub>oc</sub><br>[V] | $J_{sc}$<br>[mA cm <sup>-2</sup> ] | FF<br>[%] | PCE<br>[%] <sup>a</sup> |
|-----|-------|------------------------|------------------------------------|-----------|-------------------------|
|     | 1:1   | 0.91                   | 13.65                              | 61.81     | 7.71 (7.65)             |
| D/A | 1:1.2 | 0.92                   | 13.63                              | 62.48     | 7.83 (7.79)             |
|     | 1:1.5 | 0.91                   | 13.11                              | 62.82     | 7.51 (7.45)             |

<sup>a</sup> The average PCE in parentheses were obtained from 10 devices.

**Figure S6**

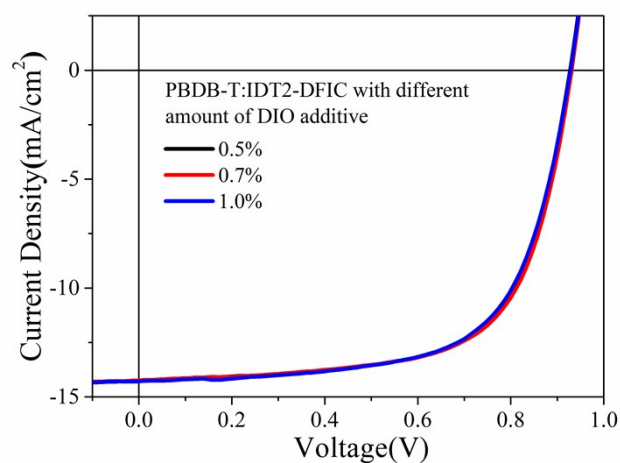

**Table S2.** Photovoltaic properties of the PSCs based on PBDB-T: IDT2-DFIC with different amount of DIO additive.

|     |       | Voc  | $J_{sc}$               | FF    | PCE              |
|-----|-------|------|------------------------|-------|------------------|
|     |       | [V]  | [mA cm <sup>-2</sup> ] | [%]   | [%] <sup>a</sup> |
| DIO | 0.5%  | 0.93 | 14.25                  | 65.37 | 8.77 (8.67)      |
|     | 0.75% | 0.93 | 14.23                  | 66.43 | 8.80 (8.69)      |
|     | 1.0%  | 0.93 | 14.28                  | 65.42 | 8.66 (8.56)      |

**Figure S7**

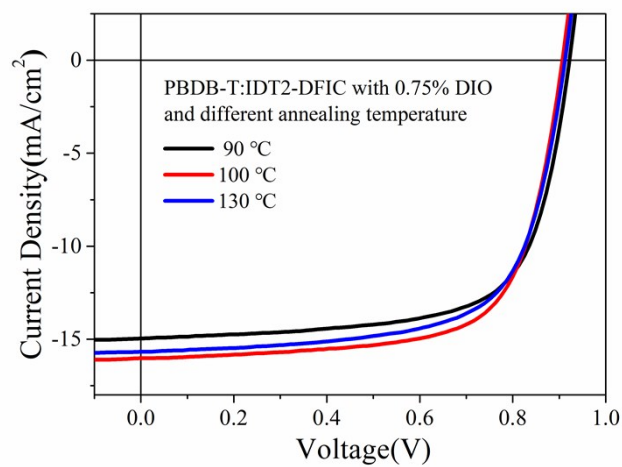

**Table S3.** Photovoltaic properties of the PSCs based on PBDB-T: IDT2-DFIC with different annealing temperature.

|    |       | Voc  | $J_{SC}$               | FF    | PCE              |
|----|-------|------|------------------------|-------|------------------|
|    |       | [V]  | [mA cm <sup>-2</sup> ] | [%]   | [%] <sup>a</sup> |
| TA | 90°C  | 0.92 | 15.48                  | 66.18 | 9.44 (9.38)      |
|    | 110°C | 0.91 | 16.00                  | 69.22 | 10.06(10.00)     |
|    | 130°C | 0.91 | 15.67                  | 67.55 | 9.66 (9.61)      |

**Figure S8**

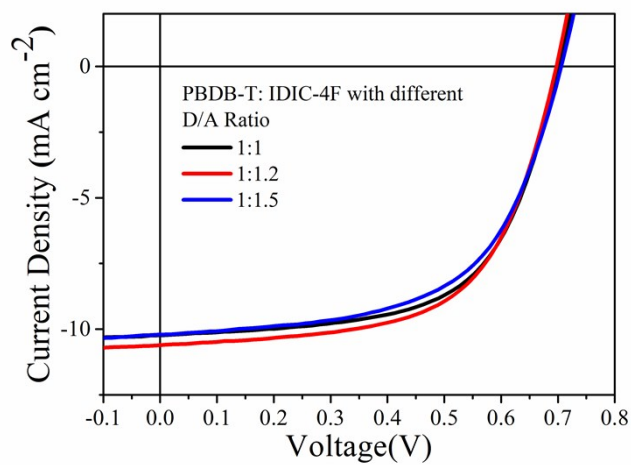

**Table S4.** Photovoltaic properties of the PSCs based on PBDB-T: IDIC-4F with different D/A Ratio.

|     |       | V <sub>oc</sub> | <i>J</i> <sub>sc</sub> | FF    | PCE              |
|-----|-------|-----------------|------------------------|-------|------------------|
|     |       | [V]             | [mA cm <sup>-2</sup> ] | [%]   | [%] <sup>a</sup> |
|     | 1:1   | 0.70            | 10.21                  | 61.50 | 4.40 (4.22)      |
| D/A | 1:1.2 | 0.70            | 10.58                  | 60.97 | 4.50 (4.41)      |
|     | 1:1.5 | 0.71            | 10.19                  | 58.61 | 4.21 (4.14)      |

**Figure S9**

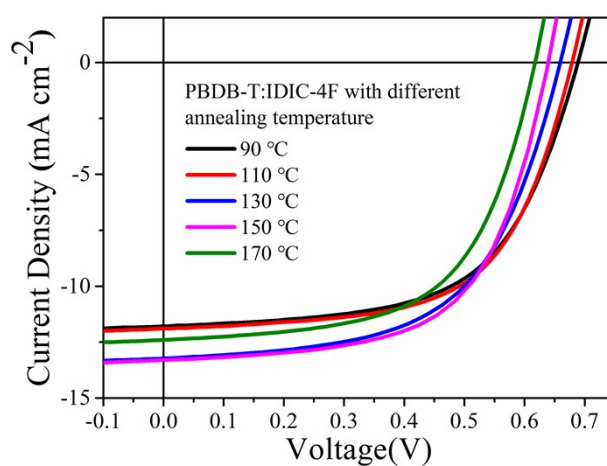

**Table S5.** Photovoltaic properties of the PSCs based on PBDB-T: IDTC-4F with different annealing temperature.

|    |       | Voc  | $J_{sc}$               | FF    | PCE              |
|----|-------|------|------------------------|-------|------------------|
|    |       | [V]  | [mA cm <sup>-2</sup> ] | [%]   | [%] <sup>a</sup> |
| TA | 90°C  | 0.69 | 11.82                  | 59.66 | 4.84 (4.83)      |
|    | 110°C | 0.68 | 11.88                  | 61.24 | 4.93 (4.83)      |
|    | 130°C | 0.66 | 13.08                  | 58.42 | 5.04 (4.97)      |
|    | 150°C | 0.64 | 13.28                  | 60.92 | 5.17 (5.15)      |
|    | 170°C | 0.62 | 12.37                  | 59.57 | 4.55 (4.52)      |

**Figure S10**

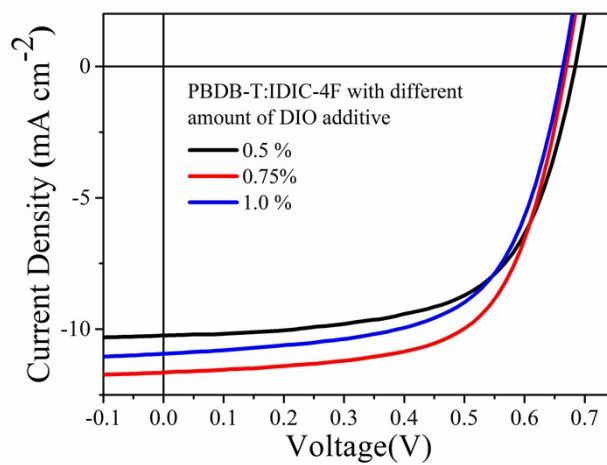

**Table S6.** Photovoltaic properties of the PSCs based on PBDB-T: IDIC-4F with different amount of DIO additive.

|     |                    | Voc  | $J_{SC}$               | FF    | PCE  |
|-----|--------------------|------|------------------------|-------|------|
|     |                    | [V]  | [mA cm <sup>-2</sup> ] | [%]   | [%]  |
| DIO | 0.5%               | 0.69 | 10.23                  | 62.81 | 4.39 |
|     | 0.5% <sup>a</sup>  | 0.64 | 11.12                  | 61.17 | 4.22 |
|     | 0.75%              | 0.67 | 11.63                  | 64.32 | 5.01 |
|     | 0.75% <sup>a</sup> | 0.65 | 11.40                  | 65.11 | 4.82 |
|     | 1.0%               | 0.66 | 10.91                  | 62.03 | 4.50 |
|     | 1.0% <sup>a</sup>  | 0.64 | 10.80                  | 62.22 | 4.28 |

**Figure S11**

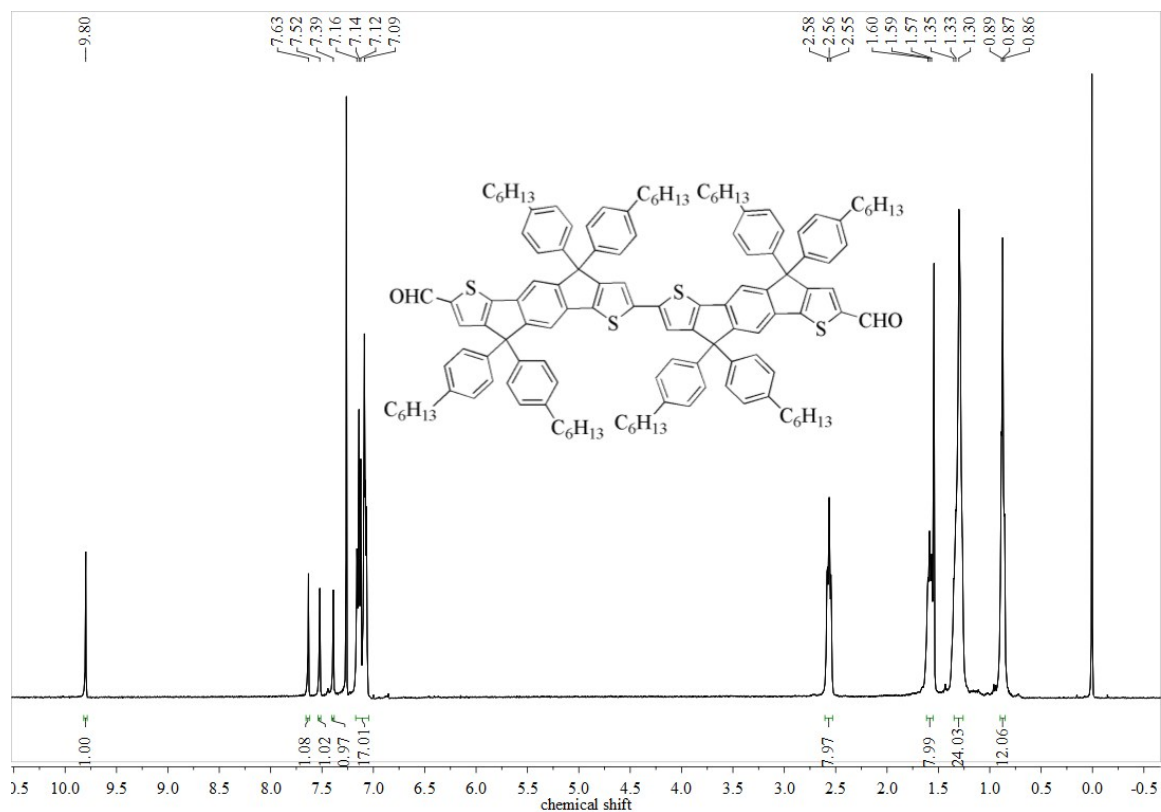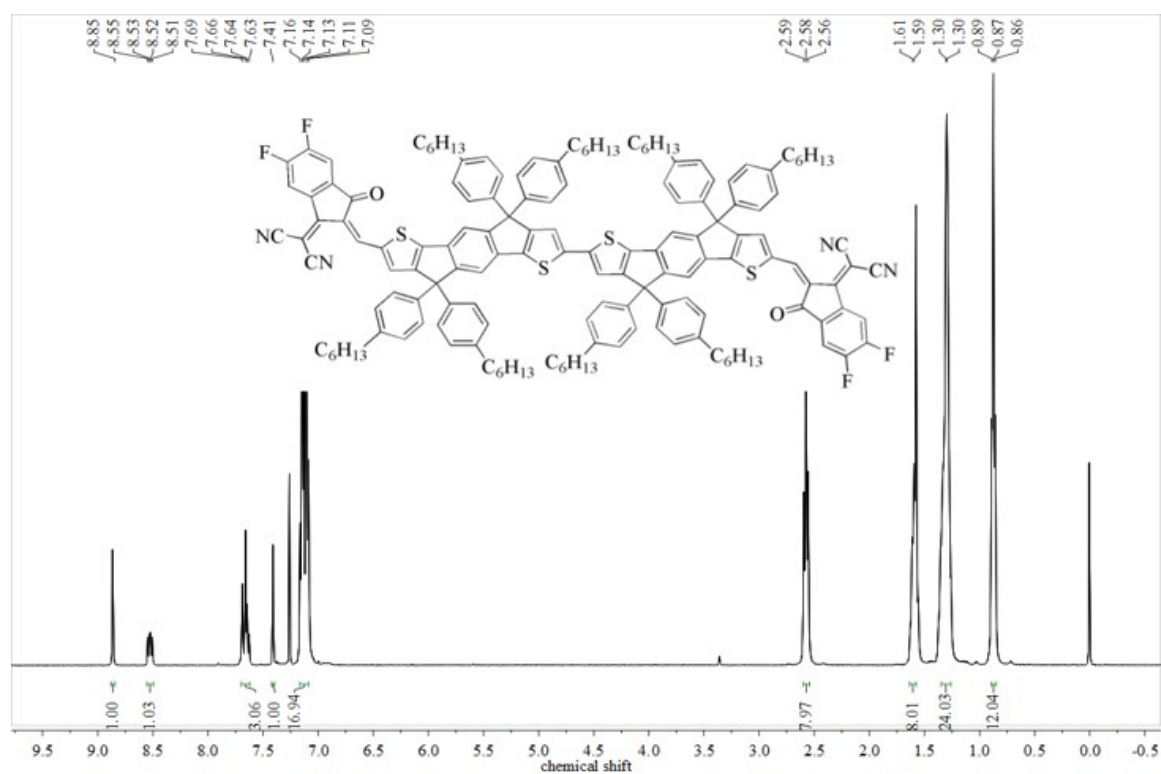

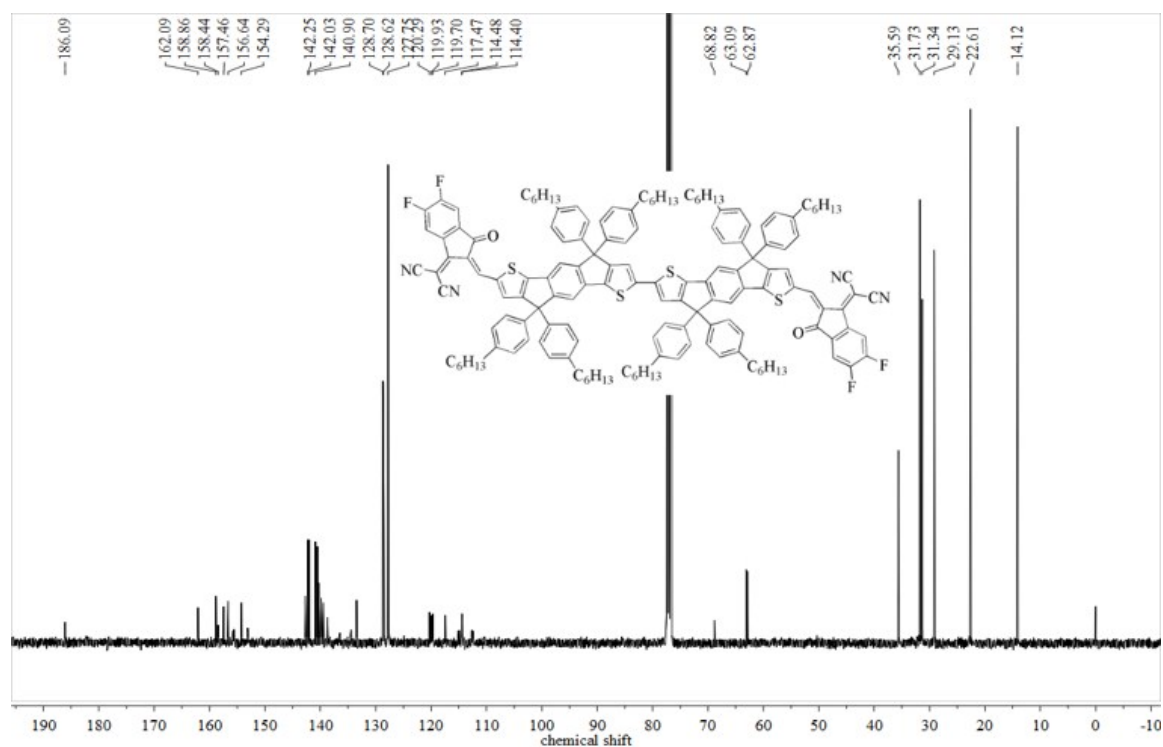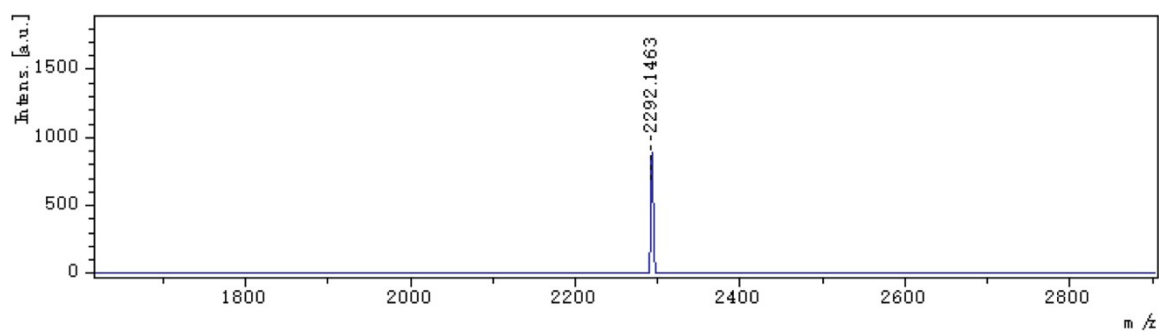

Supplement: c9tc04898g1.pdf [file c9tc04898g1.pdf]
